# Supplementary material for: Fe-Doped SnO2catalysts with both BA and LA sites: facile preparation and biomass carbohydrates conversion to methyl lactate MLA
Source: Royal Society of Chemistry journal article supplement (doi:10.1039/c7ra01655g), 2017-01-01
Supplement: c7ra01655g1.pdf [file c7ra01655g1.pdf]

## Electronic Supplementary Information (ESI)

### Fe-doped SnO<sub>2</sub> catalysts with both BA and LA sites: facile preparation and biomass carbohydrates conversion to methyl lactate MLA

**Authors:** Xiaoli Zhao,<sup>a</sup> Tao Wen,<sup>a</sup> Junjie Zhang,<sup>a</sup> Jianfeng Ye,<sup>a</sup> Zhonghua Ma,<sup>a</sup> Hong Yuan,<sup>b</sup> Xiaozhou Ye,<sup>\*a</sup> Yun Wang,<sup>\*a</sup>

<sup>a</sup>College of Science, Huazhong Agricultural University, Wuhan 430070, Hubei, PR China. E-mail: Yunwang123@126.com

<sup>b</sup>College of Chemistry Central China Normal University, Wuhan 430070, Hubei, PR China.

\* Corresponding authors

This section includes:

Fig. S1 to S12, Table S1, Table S2

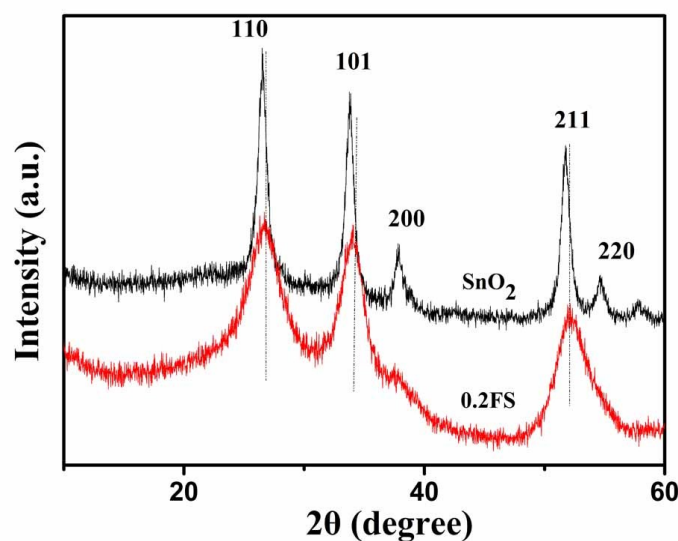

Fig.S1: X-ray diffraction patterns of SnO<sub>2</sub> and 0.2FS

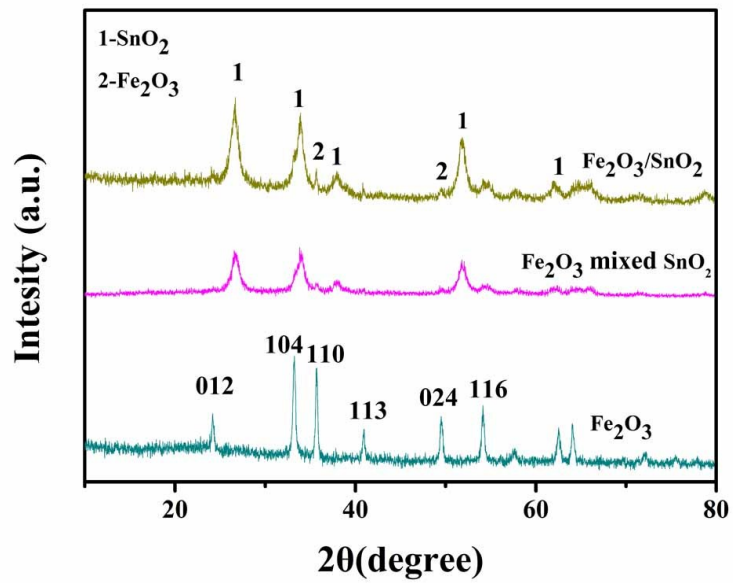

Fig.S2: X-ray diffraction patterns of  $\text{Fe}_2\text{O}_3$ ,  $\text{Fe}_2\text{O}_3/\text{SnO}_2$ ,  $\text{Fe}_2\text{O}_3$  mixed  $\text{SnO}_2$

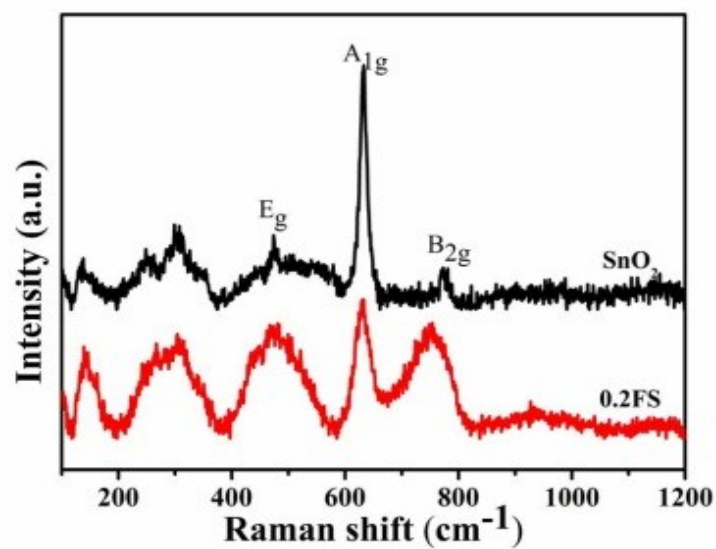

Figure S3. Raman spectra of SnO<sub>2</sub> and 0.2FS

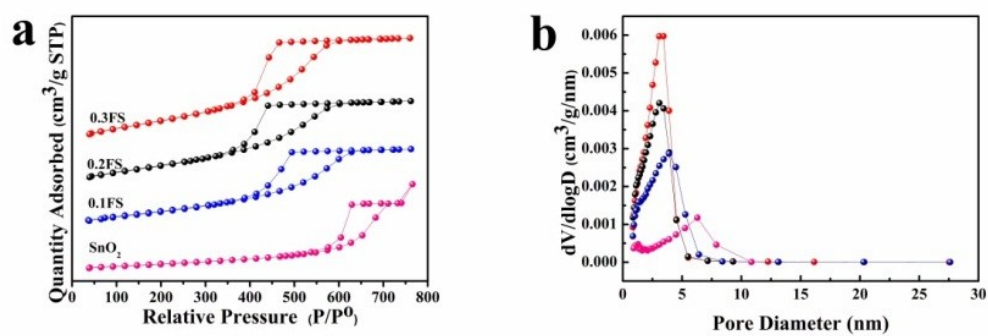

Fig.S4: N<sub>2</sub> adsorption-desorption isotherms(a) and BJH (Barrett-Joyner-Halenda) pore size distribution curves(b) of undoped and Fe-doped SnO<sub>2</sub> catalysts

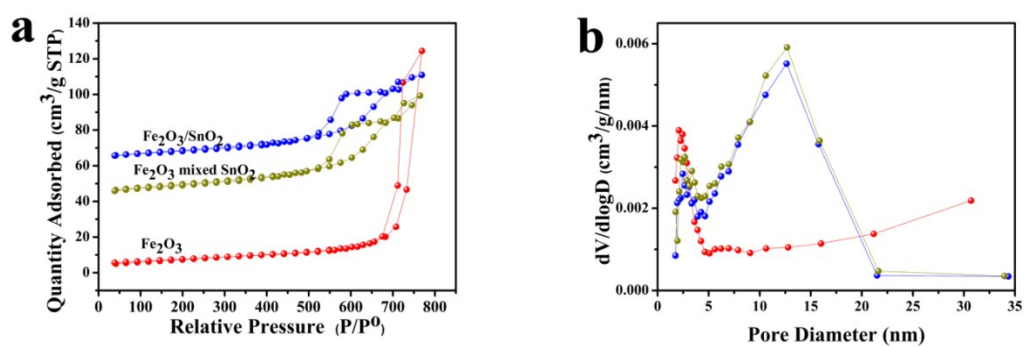

Fig.S5:  $N_2$  adsorption-desorption isotherms(a) and BJH (Barrett-Joyner-Halenda) pore size distribution curves(b) of  $Fe_2O_3$ ,  $Fe_2O_3 / SnO_2$  and  $Fe_2O_3$  mixed  $SnO_2$

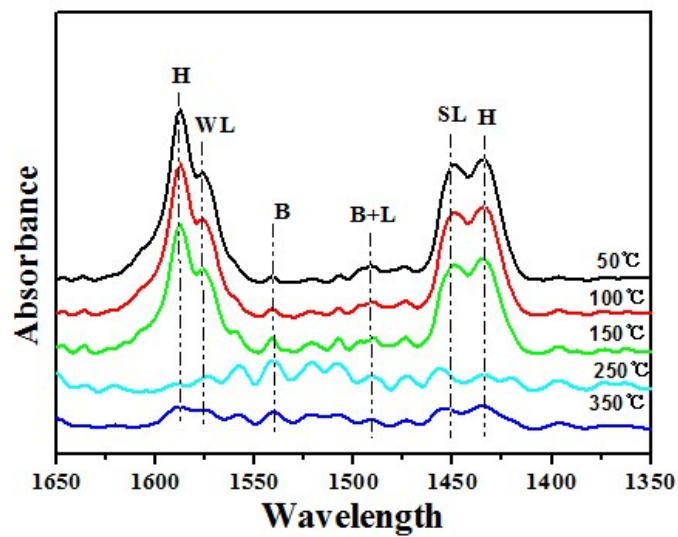

Fig.S6: Py-IR Spectra at different desorption temperatures of 0.2FS

Table S1: The content of L acid and B acid and catalytic performance of different catalyst samples

| Catalyst                                              | L (mmol/g) | B (mmol/g) | Glucose Conversion (%) | MLA Yield (%) |
|-------------------------------------------------------|------------|------------|------------------------|---------------|
| SnO <sub>2</sub>                                      | 58.81      | 0.57       | 87                     | 3             |
| Fe <sub>2</sub> O <sub>3</sub>                        | 138.31     | 2.09       | 93                     | 4             |
| Fe <sub>2</sub> O <sub>3</sub> /SnO <sub>2</sub>      | 10.89      | 1.68       | 91                     | 5             |
| Fe <sub>2</sub> O <sub>3</sub> mixed SnO <sub>2</sub> | 12.54      | 1.77       | 86                     | 3             |
| 0.1FS                                                 | 138.22     | 1.98       | 93                     | 10            |
| 0.2FS                                                 | 177.36     | 6.20       | 98                     | 35            |
| 0.3FS                                                 | 254.18     | 0.27       | 96                     | 31            |

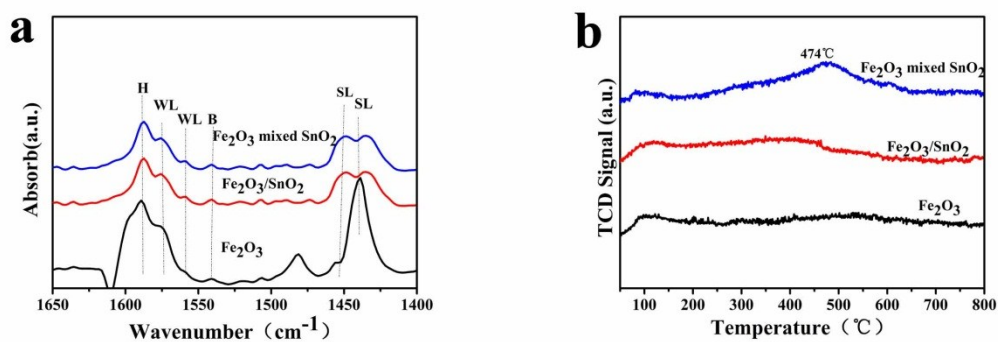

Fig.S7: The Py-IR images (a) and NH<sub>3</sub>-TPD profiles (b) of Fe<sub>2</sub>O<sub>3</sub>, Fe<sub>2</sub>O<sub>3</sub> / SnO<sub>2</sub> and Fe<sub>2</sub>O<sub>3</sub> mixed SnO<sub>2</sub>

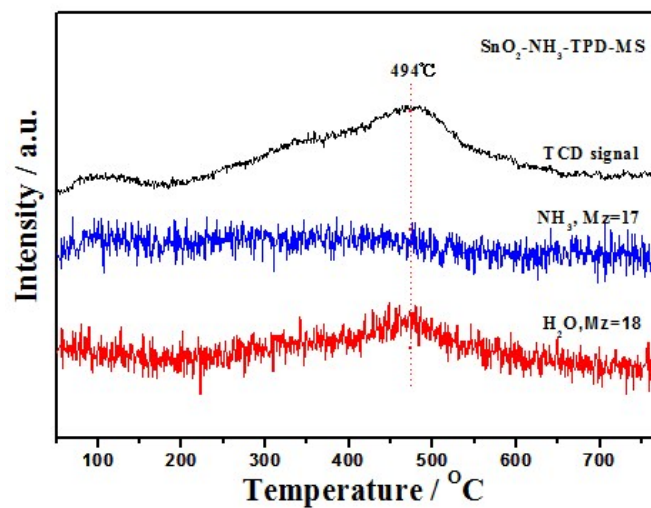

Fig.S8:  $\text{NH}_3$ -TPD-MS images of  $\text{SnO}_2$

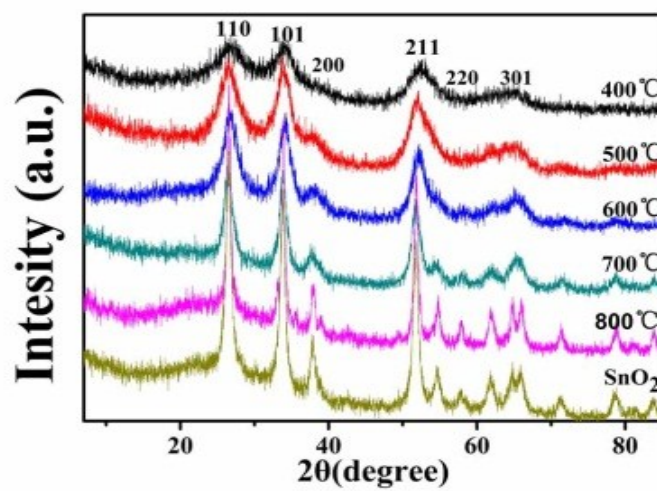

Fig. S9. X-ray diffraction patterns of Fe-doped  $\text{SnO}_2$  catalyst annealed at different temperature

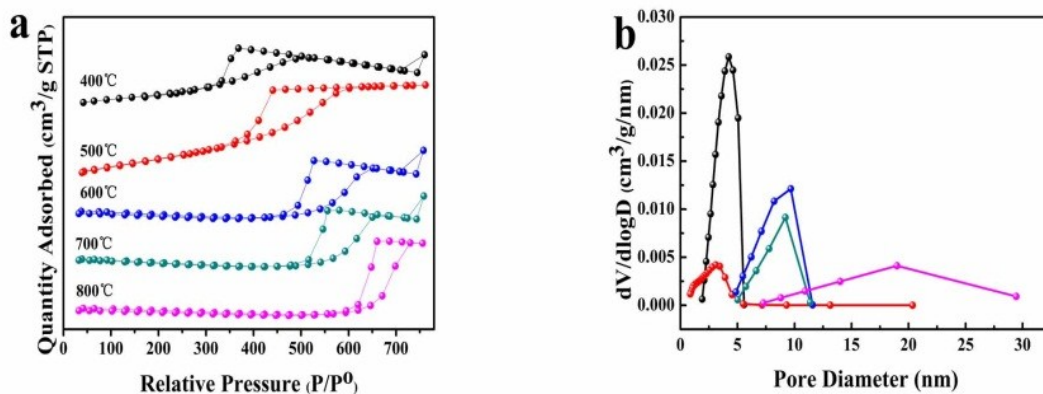

Fig. S10. (a) Nitrogen adsorption/desorption isotherms of 0.2FS catalyst annealed at different temperature. (b) corresponding distributions of pore diameters obtained from the desorption branch using the BJH method.

Table S2: Catalytic sample L Acid and B Acid content and catalytic performance at different calcination temperatures

| Catalyst | L (mmol/g) | B (mmol/g) | Glucose Conversion (%) | MLA Yield (%) |
|----------|------------|------------|------------------------|---------------|
| 400°C    | 373.14     | 1.92       | 99                     | 25            |
| 500°C    | 177.36     | 6.20       | 99                     | 35            |
| 600°C    | 432.58     | 1.53       | 99                     | 27            |
| 700°C    | 353.85     | 1.05       | 99                     | 27            |
| 800°C    | 472.76     | 2.37       | 99                     | 26            |

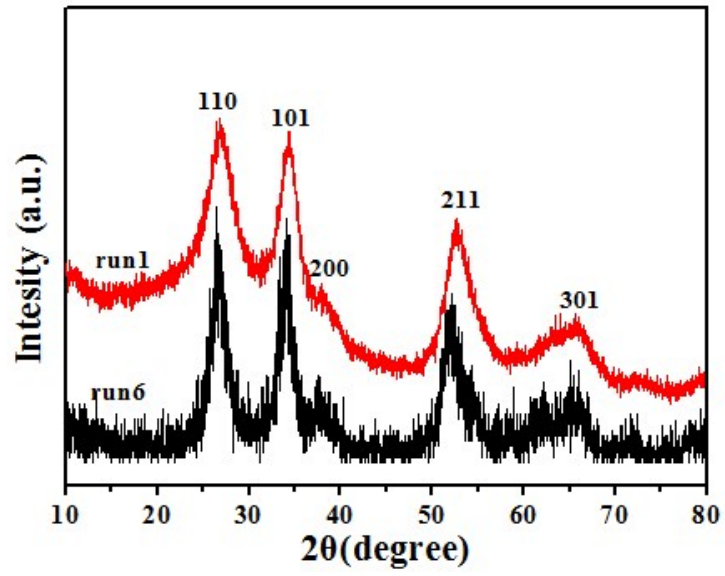

Fig.S11: X-ray diffraction patterns of of 0.2FS after cyclic test

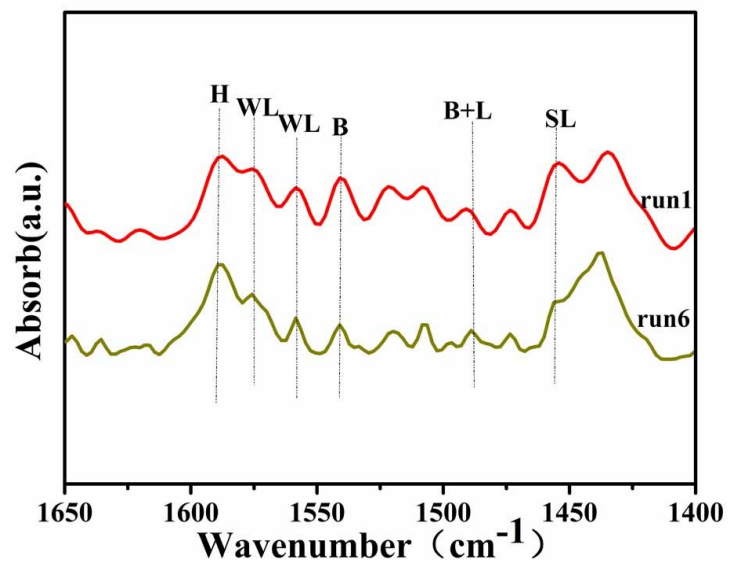

Fig.S12: The Py-IR images of 0.2FS after cyclic test
